# Supplementary material
Source: bioRxiv or medRxiv preprint supplement (https://www.biorxiv.org/highwire/filestream/2256/field_highwire_adjunct_files/0/008862-1.pdf)

C3647 P15+5

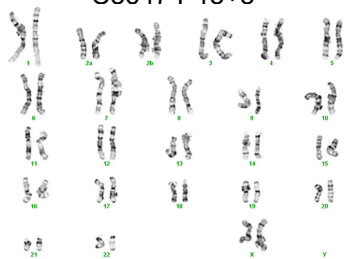

C3649 P15+6

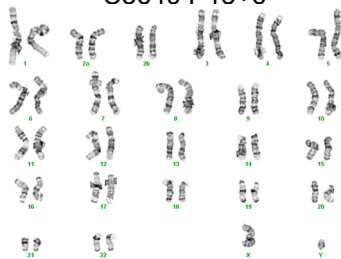

C3651 P12+5

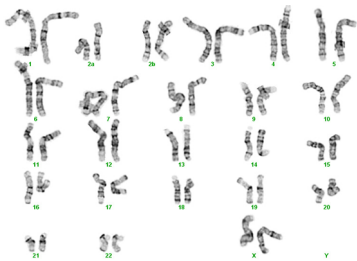

C8861 P19+5

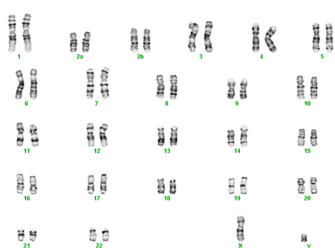

C40210 P20+5

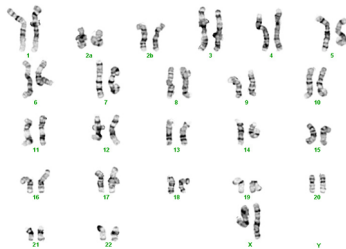

C40280 P14+5

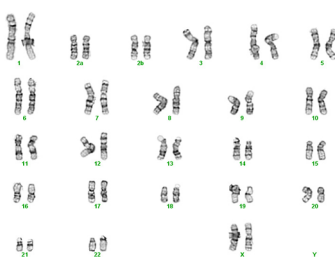

Supplement: Supplementary file [file 008862-1.pdf]
